# Supplementary material for: Determinants of women’s satisfaction with maternal health care: a review of literature from developing countries
Source: BMC Pregnancy Childbirth. 2015 Apr 18;15:97. doi: 10.1186/s12884-015-0525-0 (PMC4417271; doi:10.1186/s12884-015-0525-0)
Supplement: Additional file 1: — Formats for data extraction. [file 12884_2015_525_MOESM1_ESM.pdf]

## Formats for data extraction

### 1. Study Summary Listing Format

| Study ID                        | Year | Publication type | About Study                                | Maternal satisfaction/perception measured through | Inclusion decision       |
|---------------------------------|------|------------------|--------------------------------------------|---------------------------------------------------|--------------------------|
| <i>First Author &amp; Title</i> |      |                  | <i>Study type, objective &amp; setting</i> | <i>Details of methodology / tool</i>              | <i>Decision: Reason:</i> |

### 2. Detailed Data extraction format

| Study / design                                                                                                                                                                                                                                                                       | Participants                                                                                                                                                                                                                                   | Analysis / Interventions                                                                                                                                          | Outcome measures                                                                                            |
|--------------------------------------------------------------------------------------------------------------------------------------------------------------------------------------------------------------------------------------------------------------------------------------|------------------------------------------------------------------------------------------------------------------------------------------------------------------------------------------------------------------------------------------------|-------------------------------------------------------------------------------------------------------------------------------------------------------------------|-------------------------------------------------------------------------------------------------------------|
| <i>Study ID/ year</i><br><br>Country:<br><br>Region:<br><br>Time frame:<br><br>Location / setting:<br><br>Focus / primary aim of study:<br><br>Determinants of satisfaction:<br><br>Study design:<br><br>Funding:<br><br>Quality: <i>high / moderate / low from assessment below</i> | <u>Population: number and description</u> (age, gender, ethnicity, socio-economic characteristics)<br><br>Selection criteria:<br><br><u>Health system information:</u><br>Health professionals / services involved:<br><br>Subgroups (if any): | Data collection methods:<br><br>Instrument for assessing patient satisfaction/ feedback:<br><br>Data analysis methods:<br><br>Details of data quality management: | Primary outcomes:<br><br>Outcomes relating to determinants of maternal satisfaction:<br><br>Other outcomes: |
|                                                                                                                                                                                                                                                                                      |                                                                                                                                                                                                                                                |                                                                                                                                                                   |                                                                                                             |
